# Supplementary material for: Reconstructing ZnO quantum dot assembled tubular structures from nanotubes within graphene matrix via ongoing pulverization towards high-performance lithium storage
Source: Royal Society of Chemistry journal article supplement (doi:10.1039/c6ta07627k), 2016-01-01
Supplement: c6ta07627k1.pdf [file c6ta07627k1.pdf]

## Electronic Supporting Information

### **Reconstructing ZnO quantum dot assembled tubular structures from nanotubes within graphene matrix *via* ongoing pulverization towards high-performance lithium storage<sup>†</sup>**

Zihua Li,<sup>a,c</sup> Xiao Yu,<sup>a,c</sup> Yong Liu,<sup>\*,a,c</sup> Wenxia Zhao,<sup>b</sup> Hao Zhang,<sup>b</sup> Ruimei Xu,<sup>b</sup> Donghai Wang<sup>c</sup> and Hui Shen<sup>c</sup>

<sup>a</sup>*School of Materials Science and Engineering, State Key Laboratory of Optoelectronic Materials and Technologies, Sun Yat-sen University, Guangzhou 510275, China*

<sup>b</sup>*Instrumental Analysis & Research Center, Sun Yat-sen University, Guangzhou 510275, China*

<sup>c</sup>*Institute for Solar Energy System, Guangdong Provincial Key Laboratory of Photovoltaics Technologies, Sun Yat-sen University, Guangzhou 510275, China*

*E-mail: liuyong7@mail.sysu.edu.cn*

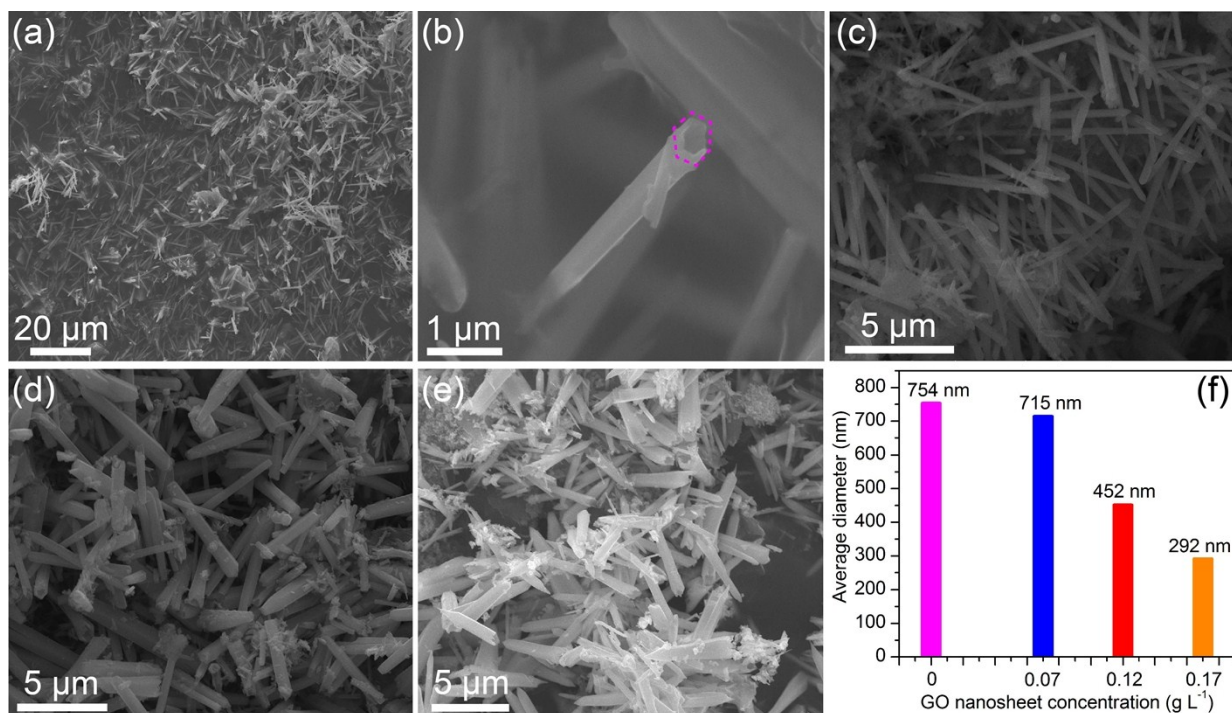

**Fig. S1** FESEM images and corresponding histogram showing the morphological evolution of ZnO nanotubes by adding different concentration of GO nanosheets in reaction solution. (a) and (b) 0.17 g L<sup>-1</sup>, (c) 0.12 g L<sup>-1</sup>, (d) 0.06 g L<sup>-1</sup>, (e) 0 g L<sup>-1</sup>, and (f) The histogram showing relations of average diameters of ZnO nanotubes summarized in above FESEM images and concentration of GO nanosheets in the reaction.

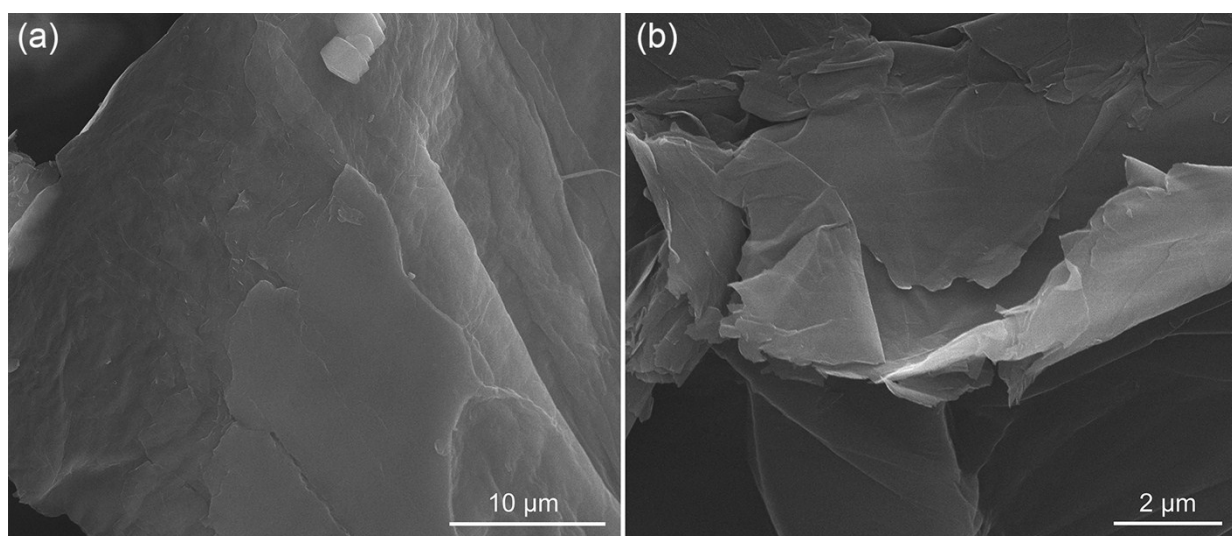

**Fig. S2** FESEM images of (a) as-synthesized graphene oxide nanosheets and (b) graphene nanosheets obtained by after reduction heat treatments at 700 °C for 2 h under 5% hydrogen in nitrogen atmosphere.

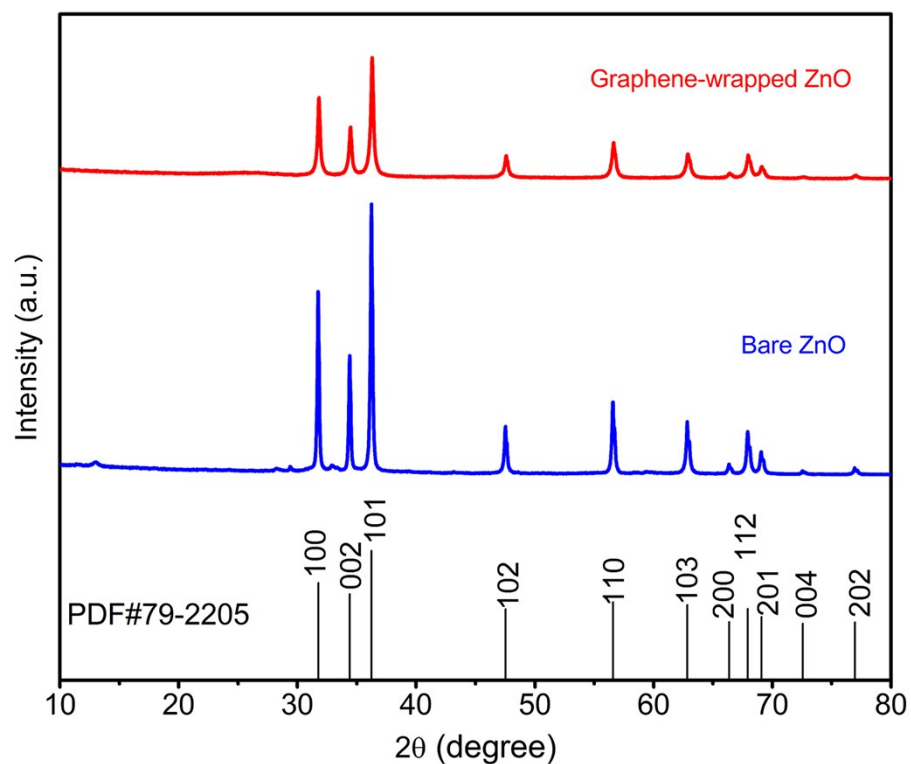

**Fig. S3** XRD patterns of post-annealed graphene-wrapped ZnO nanotubes and bare ZnO nanotubes.

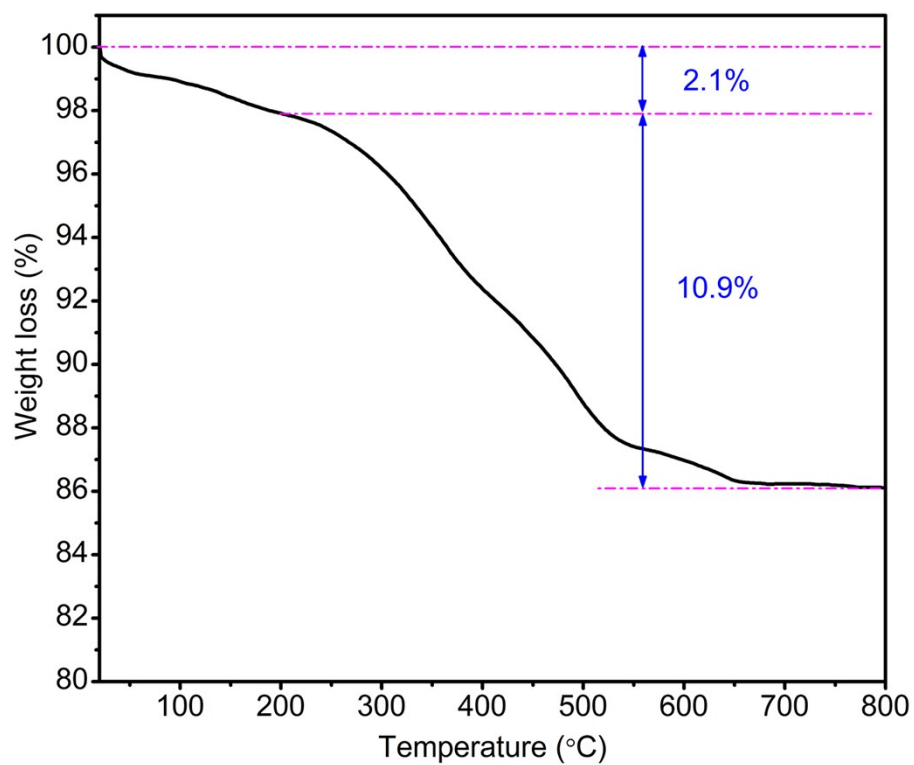

**Fig. S4** The TGA curve of the post-annealed graphene-wrapped ZnO.

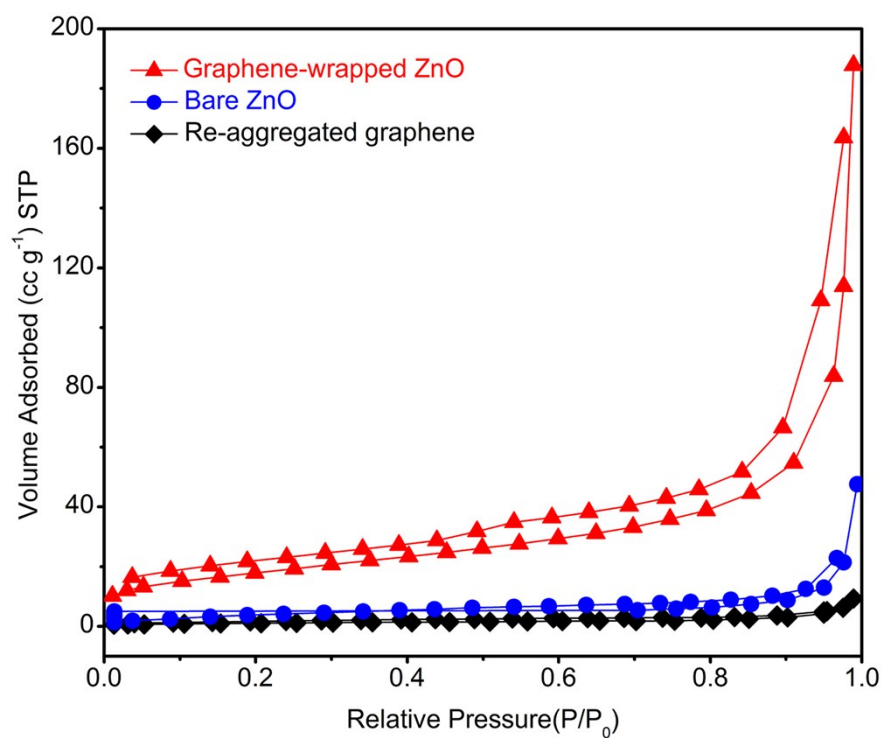

**Fig. S5** N<sub>2</sub> adsorption-desorption isotherm of the post-annealed graphene-wrapped ZnO, bare ZnO and re-aggregated graphene.

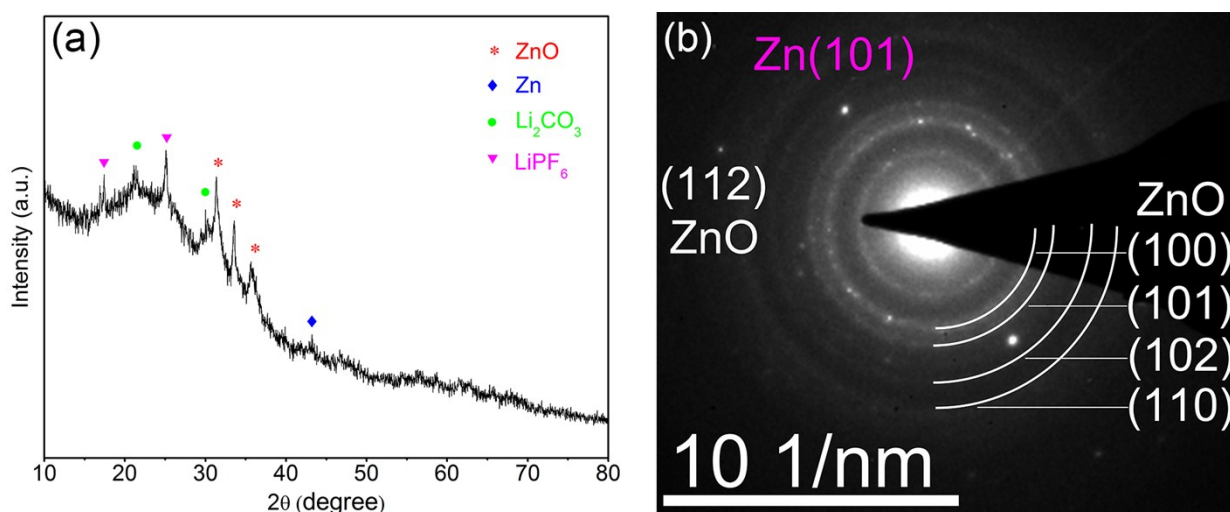

**Fig. S6** (a) XRD pattern and (b) SAED of the graphene-wrapped ZnO electrode after 1000 discharge/charge cycles at a current density of 2000 mA g<sup>-1</sup>.

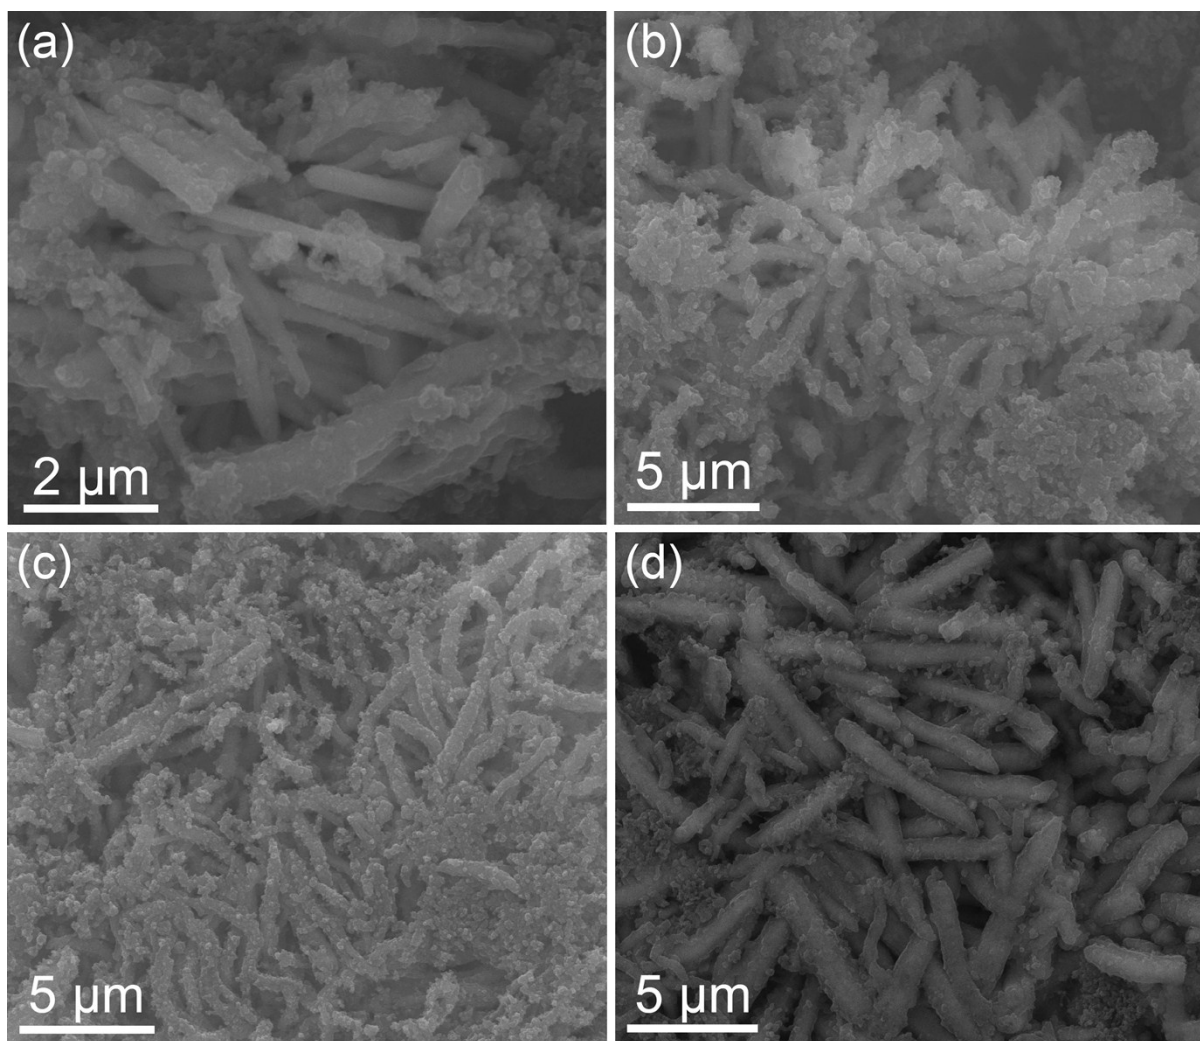

**Fig. S7** FESEM images of graphene-wrapped ZnO electrodes after (a) 2, (b) 100, (c) 400 and (d) 700 discharge/charge cycles at a current density of  $2000 \text{ mA g}^{-1}$ .

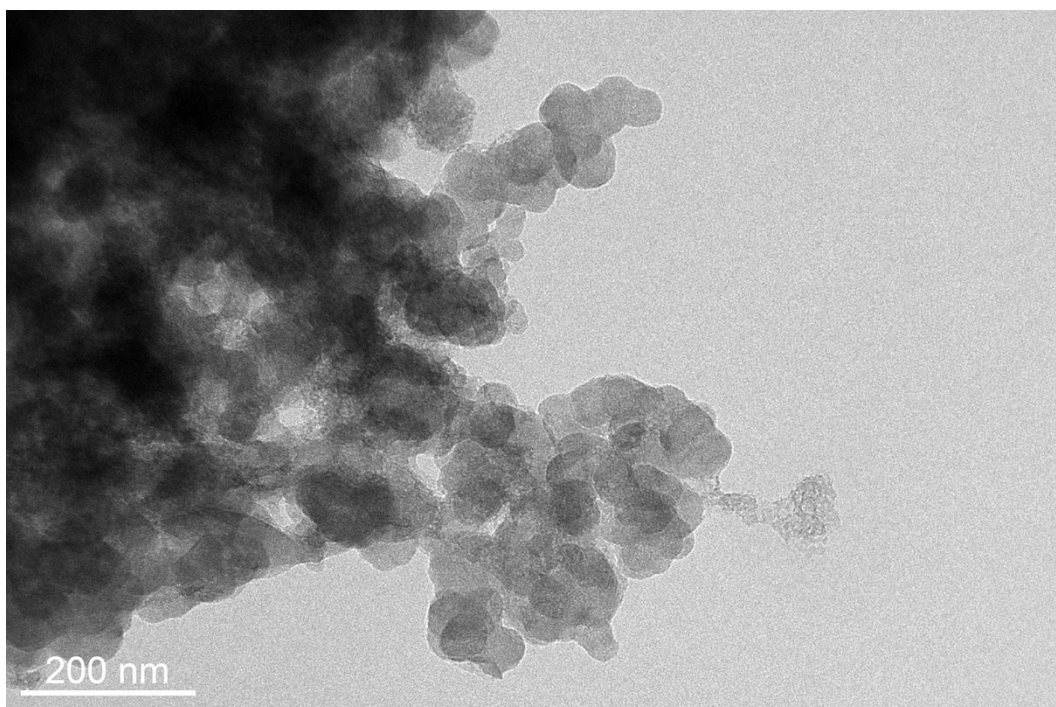

**Fig. S8** TEM image of the graphene-wrapped ZnO electrode after 100 discharge/charge cycles at a current density of  $2000 \text{ mA g}^{-1}$ .

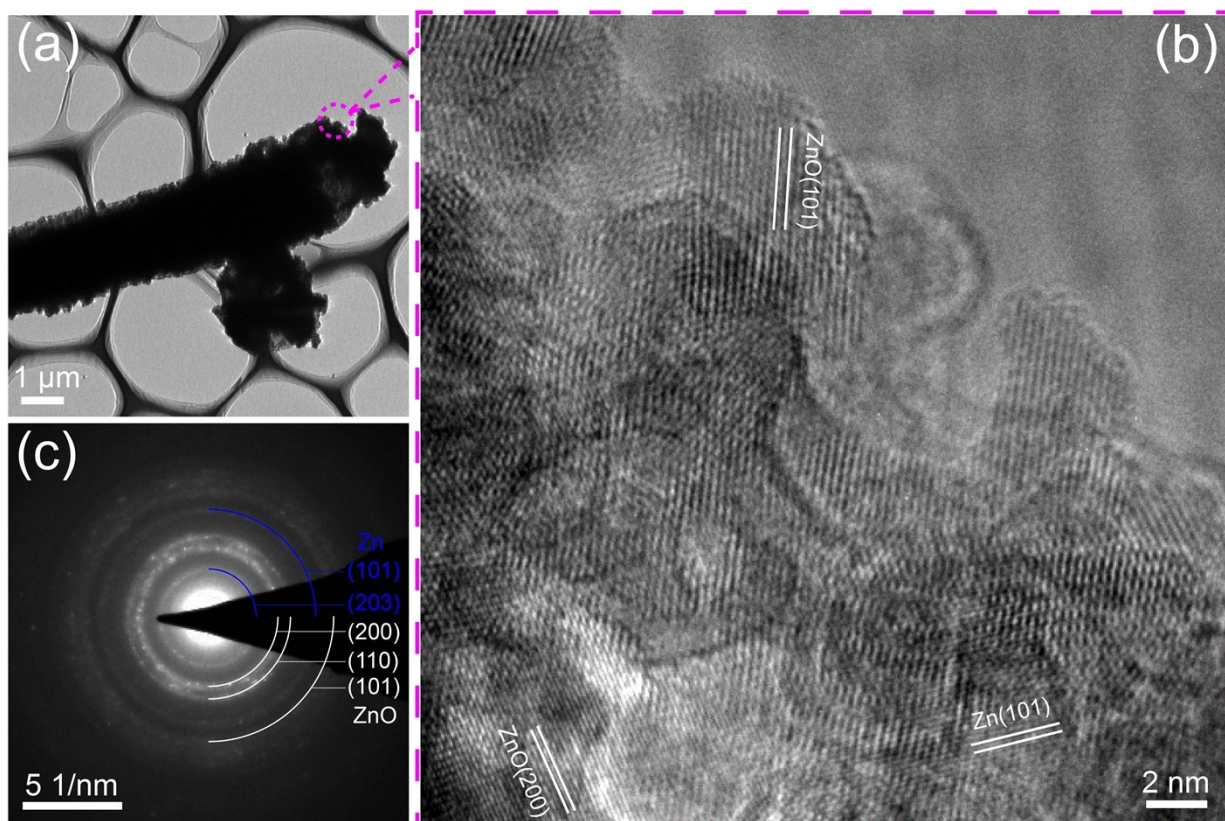

**Fig. S9** (a) The TEM image, (b) HRTEM image and (c) SAED of the graphene-wrapped ZnO electrode after 400 discharge/charge cycles at a current density of  $2000 \text{ mA g}^{-1}$ .

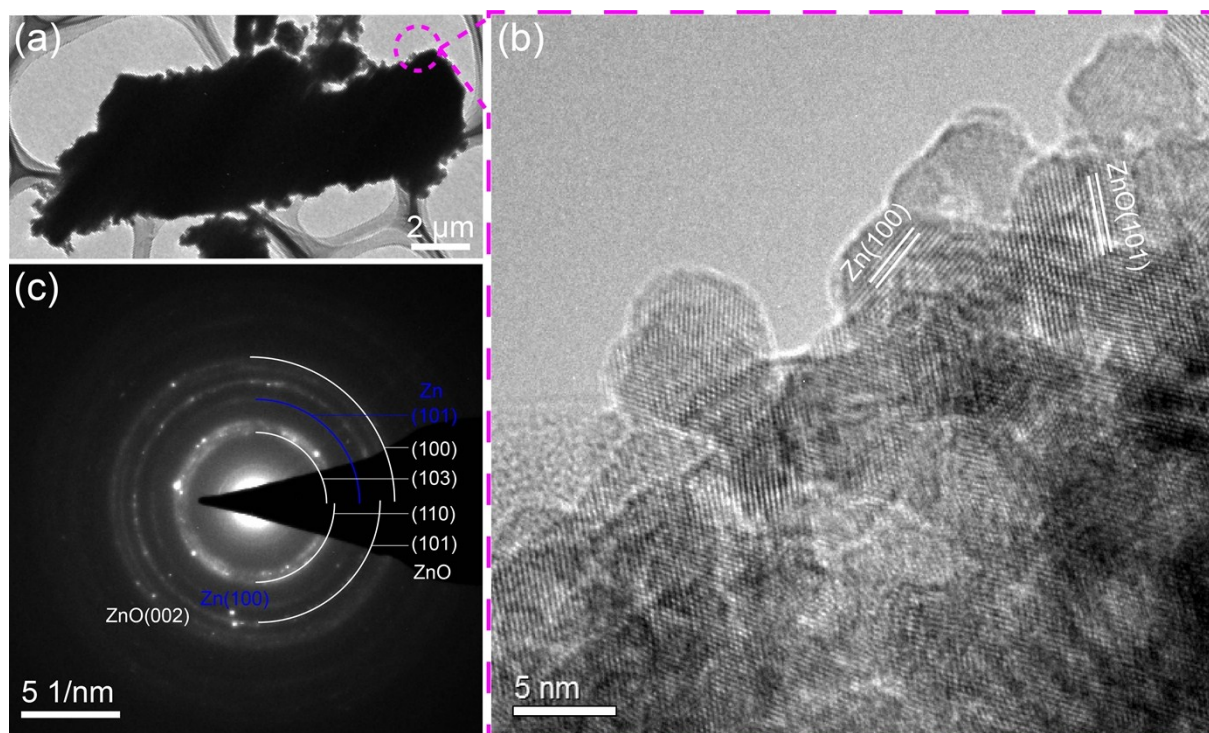

**Fig. S10** (a) The TEM image, (b) HRTEM image and (c) SAED of the graphene-wrapped ZnO electrode after 400 discharge/charge cycles at a current density of  $2000 \text{ mA g}^{-1}$ .

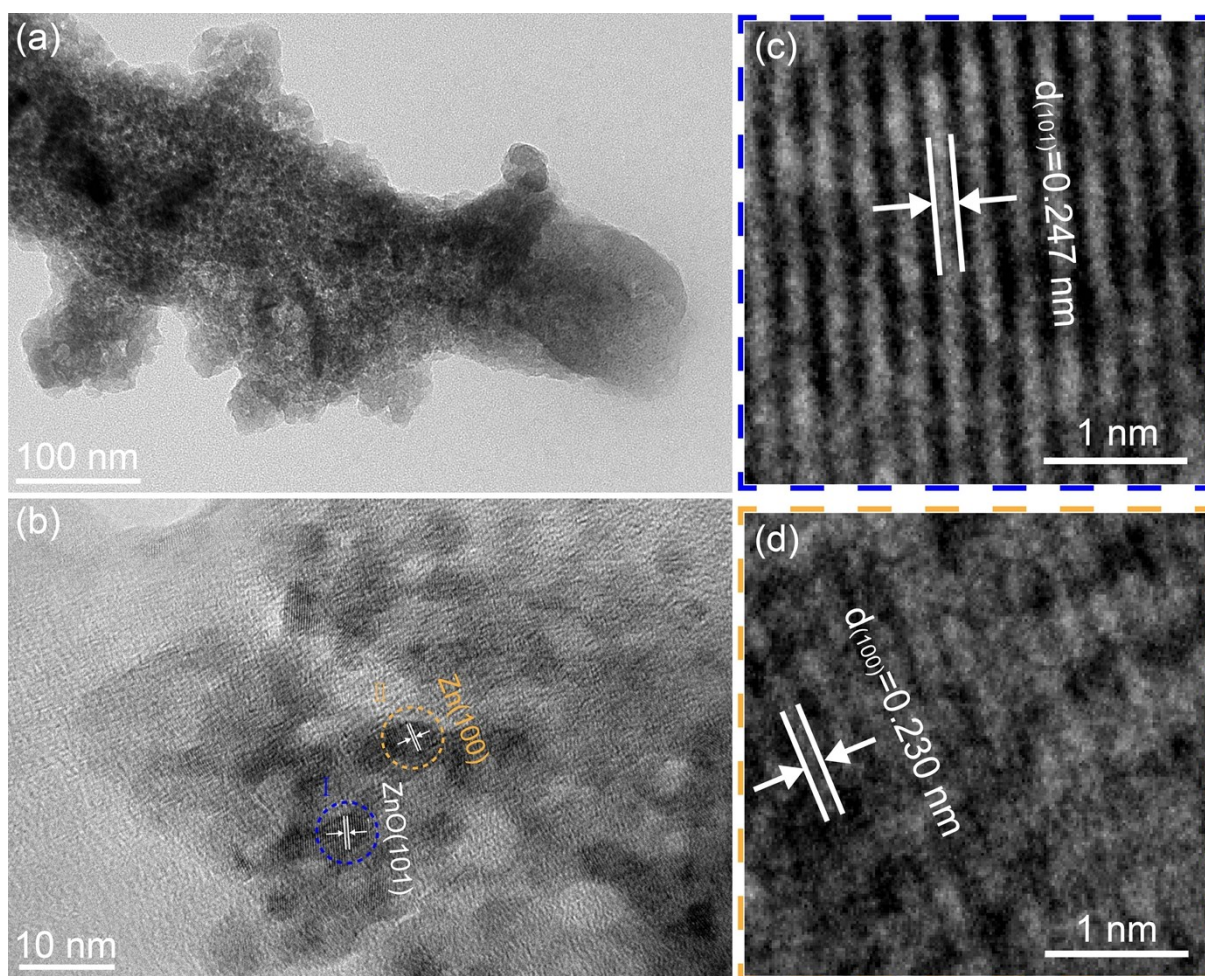

**Fig. S11** TEM images of the graphene-wrapped ZnO quantum dots assembled tubular structure after completion of 1000 discharge/charge cycles at a current density of  $2000 \text{ mA g}^{-1}$ . (a) TEM and (b) HRTEM images. (c) and (d) Magnified HRTEM images corresponded to region I and II outlined by dashed line in (b).

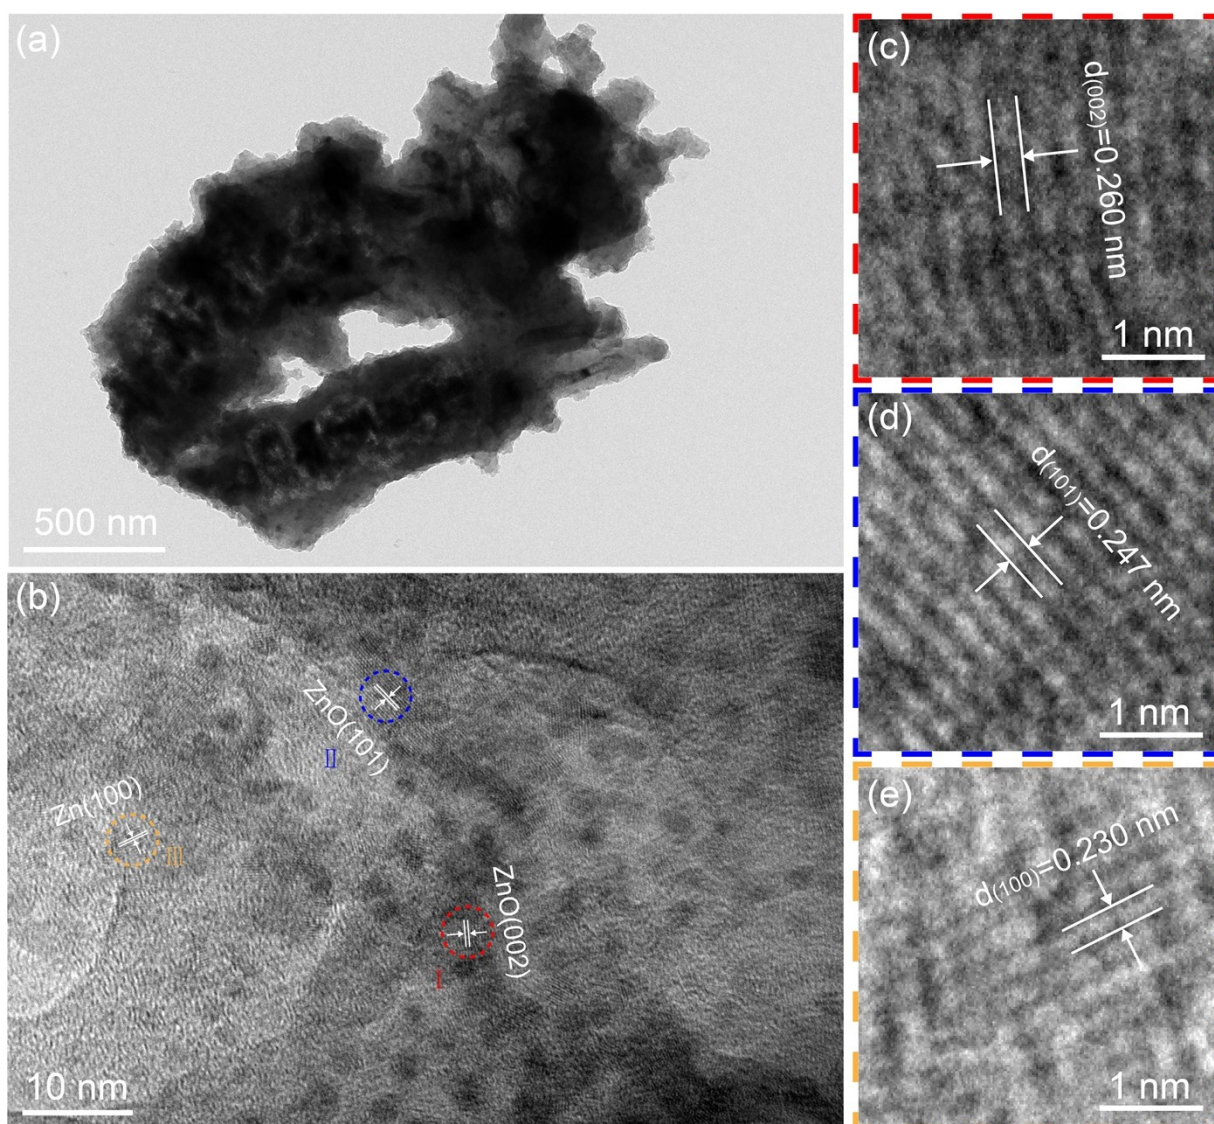

**Fig. S12** TEM images of the graphene-wrapped ZnO quantum dots assembled tubular structure after completion of 1000 discharge/charge cycles at a current density of  $2000 \text{ mA g}^{-1}$ . (a) TEM and (b) HRTEM images. (c), (d) and (e) Magnified HRTEM images corresponded to region I, II and III outlined by dashed line in (b).

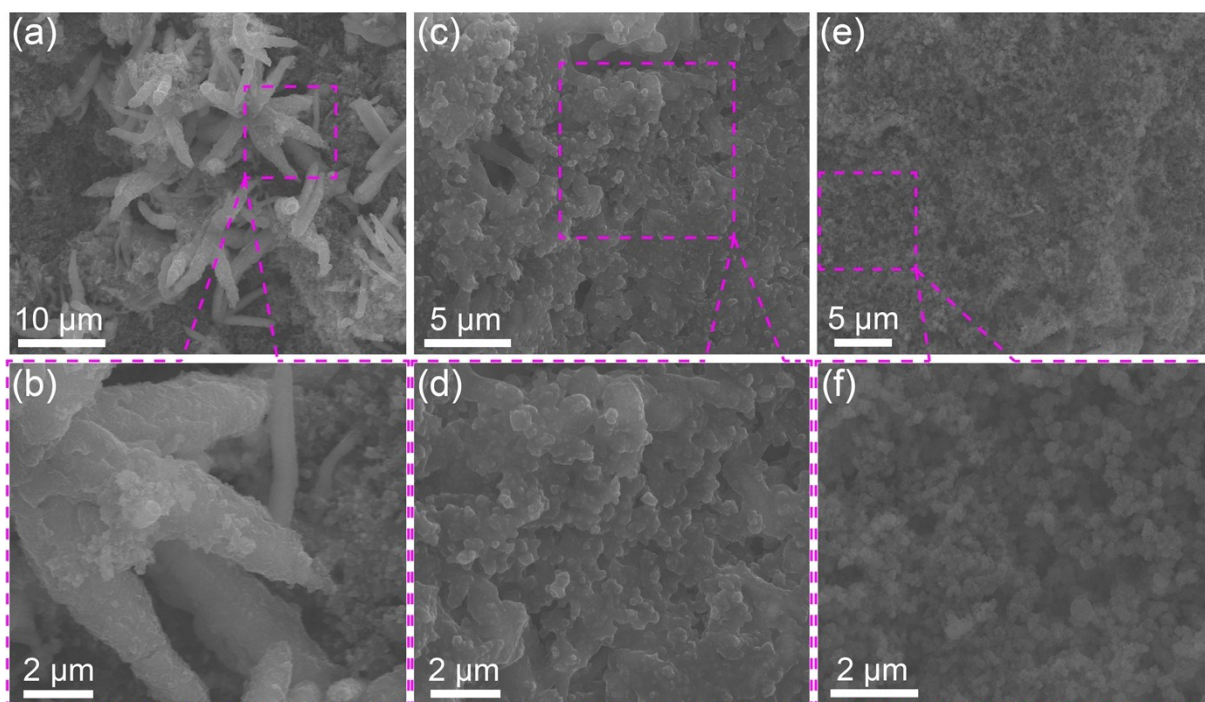

**Fig. S13** FESEM images the cycled bare ZnO electrode after (a) and (b) 2 discharge/charge cycles, (c) and 100 discharge/charge cycles, and (e) and (f) 1000 discharge/charge cycles at a current density of 2000 mA g<sup>-1</sup>.

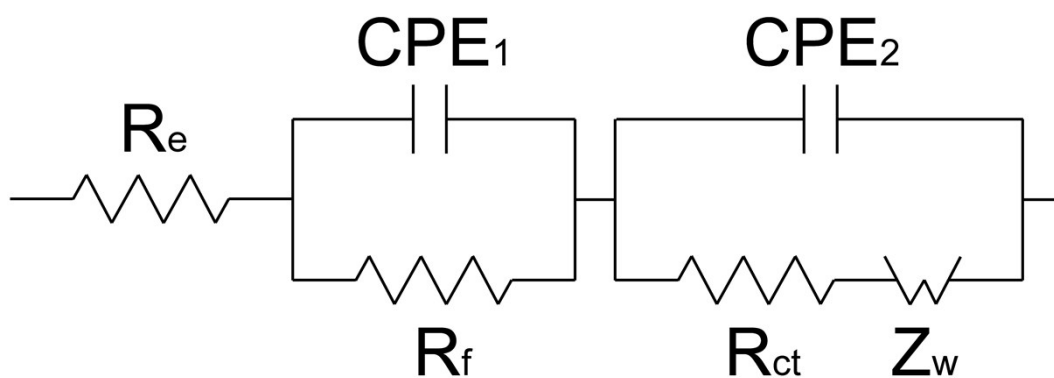

**Fig. S14** The equivalent circuit used to fit the Nyquist plots of the graphene-wrapped ZnO and bare ZnO electrodes. In this model,  $R_e$  represents the internal resistance of cells, and  $R_f$  and  $CPE_1$  are associated with the resistance and constant phase element of SEI film, respectively.  $R_{ct}$  and  $CPE_2$  depict the charge transfer resistance and constant phase element of the electrode/electrolyte interface, respectively. Meanwhile,  $Z_w$  is the Warburg impedance.

**Table S1.** Summary of the electrochemical performance of various ZnO-based anode materials for lithium-ion batteries.

| Materials       | Morphology                              | Discharged capacity<br>(mAh g <sup>-1</sup> ) | Cycles | Current density<br>(mA g <sup>-1</sup> ) | Ref.     |
|-----------------|-----------------------------------------|-----------------------------------------------|--------|------------------------------------------|----------|
| ZnO             | Hierarchical flower-like nanospheres    | 381                                           | 30     | 493.5                                    | 28       |
| ZnO             | Ultralong mesoporous nanowires          | 392                                           | 50     | 98.7                                     | 29       |
| ZnO             | Ultrathin nanotubes                     | 386                                           | 50     | 494                                      | 30       |
| ZnO             | Mesoporous nanosheets                   | 421                                           | 100    | 20                                       | 31       |
| ZnO             | Dandelion-like nanorod arrays           | 310                                           | 40     | --                                       | 32       |
| Au-ZnO          | Hierarchical flower-like nanostructures | 392                                           | 50     | 120                                      | 33       |
| Al-ZnO          | Nanoparticles                           | 418                                           | --     | 50                                       | 34       |
| ZnO-Ag-C        | Porous microspheres                     | 729                                           | 200    | 100                                      | 5        |
| ZnO/Graphene    | Nanocrystals                            | ~300                                          | 25     | 50                                       | 17       |
| Al-ZnO-graphene | Aerogel composite                       | 490                                           | 100    | 100                                      | 6        |
| ZnO/MWCNT       | Nanotube Nanocomposite                  | 460                                           | 100    | 197.4                                    | 35       |
| ZnO/Ketjenblack | Porous structure                        | 538.4                                         | 100    | 100                                      | 36       |
| ZnO/Graphene    | Nanotubes                               | 1058                                          | 200    | 100                                      | Our work |
|                 |                                         | 747                                           | 200    | 200                                      |          |
|                 |                                         | 683                                           | 200    | 500                                      |          |
|                 |                                         | 891                                           | 1000   | 2000                                     |          |

**Table S2.** Kinetic parameters of graphene-wrapped ZnO and bare ZnO electrodes before and after different galvanostatic discharging/charging cycles.

| Graphene-wrapped ZnO electrodes | R <sub>ct</sub> (Ω) | Bare ZnO electrodes | R <sub>ct</sub> (Ω) |
|---------------------------------|---------------------|---------------------|---------------------|
| Before cycling                  | 26.4                | Before cycling      | 36.7                |
| After 2 cycles                  | 28.3                |                     |                     |
| After 50 cycles                 | 214.7               |                     |                     |
| After 100 cycles                | 245.9               | After 100 cycles    | 301.4               |
| After 400 cycles                | 38.1                |                     |                     |
| After 700 cycles                | 33.1                |                     |                     |
| After 1000 cycles               | 13.9                | After 1000 cycles   | 313.2               |
